# Supplementary material for: Why Urban Citizens in Developing Countries Use Traditional Medicines: The Case of Suriname
Source: PubMed Central journal article supplement (PMC3638607; doi:10.1155/2013/687197), 2013-04-07
Supplement: 687197.f1.pdf [file 687197.f1.pdf]

**Appendix 2. Traditional medicines mentioned during the 270 interviews in Paramaribo, Suriname (2006).**

MEDICINAL PLANTS

| Local name (s)                 | English name             | Plant part                         | Species                                           | Family           | Mentioned | Used in the past<br>12 months |
|--------------------------------|--------------------------|------------------------------------|---------------------------------------------------|------------------|-----------|-------------------------------|
| redi katoen                    | red cotton               | leaves                             | <i>Gossypium barbadense</i> L.                    | Malvaceae        | 58        | 37                            |
| fini bita                      | carry me seed            | entire plant                       | <i>Phyllanthus amarus</i> Schumach. & Thonn.      | Phyllanthaceae   | 48        | 34                            |
| kwasibita                      | bitterwood, bitter ash   | wood                               | <i>Quassia amara</i> L.                           | Simaroubaceae    | 48        | 32                            |
| neem                           | neem                     | leaves                             | <i>Azadirachta indica</i> A.Juss.                 | Meliaceae        | 39        | 19                            |
| noni                           | noni                     | fruit                              | <i>Morinda citrifolia</i> L.                      | Rubiaceae        | 36        | 19                            |
| citroengras                    | lemongrass               | leaves                             | <i>Cymbopogon citratus</i> (DC.) Stapf            | Poaceae          | 35        | 20                            |
| sopropo, wilde                 | bitter melon (wild form) | entire plant                       | <i>Momordica charantia</i> L.                     | Cucurbitaceae    | 31        | 16                            |
| knoflook                       | garlic                   | bulb (imported)                    | <i>Allium sativum</i> L.                          | Alliaceae        | 29        | 19                            |
| konsaka wiwiri                 | pepper elder             | entire plant                       | <i>Peperomia pellucida</i> (L.) Kunth             | Piperaceae       | 20        | 12                            |
| kokosnoot                      | coconut                  | fruit, shell, juice, oil from seed | <i>Cocos nucifera</i> L.                          | Arecaceae        | 17        | 10                            |
| monkimonki kersie              | Surinam cherry           | leaves                             | <i>Eugenia uniflora</i> L.                        | Myrtaceae        | 17        | 8                             |
| zuurzak                        | soursop                  | leaves                             | <i>Annona muricata</i> L.                         | Annonaceae       | 16        | 9                             |
| sisibi wiwiri                  | sweet broom              | entire plant                       | <i>Scoparia dulcis</i> L.                         | Scrophulariaceae | 16        | 9                             |
| aloe vera                      | aloes                    | leaves                             | <i>Aloe vera</i> (L.) Burm.f.                     | Asphodelaceae    | 13        | 8                             |
| guyave                         | guava                    | fruit, leaves                      | <i>Psidium guajava</i> L.                         | Myrtaceae        | 13        | 6                             |
| suikerriet, ingi tjen, melasse | sugarcane                | stem, leaves, syrup, juice         | <i>Saccharum officinarum</i> L.                   | Poaceae          | 12        | 11                            |
| lemmetje                       | lime                     | fruit                              | <i>Citrus aurantiifolia</i> (Christm.) Swingle    | Rutaceae         | 12        | 10                            |
| swa alanya                     | bitter orange            | fruit                              | <i>Citrus aurantium</i> L.                        | Rutaceae         | 11        | 8                             |
| jarakopi, koorsuwiri           | -                        | leaves                             | <i>Siparuna guianensis</i> Aubl.                  | Siparunaceae     | 11        | 8                             |
| soepgroente                    | celery                   | leaves                             | <i>Apium graveolens</i> L.                        | Apiaceae         | 10        | 10                            |
| blaka uma                      | black sage               | leaves                             | <i>Cordia curassavica</i> (Jacq.) Roem. & Schult. | Boraginaceae     | 10        | 7                             |
| gember (stroop)                | ginger                   | rhizome (syrup)                    | <i>Zingiber officinale</i> Roscoe                 | Zingiberaceae    | 10        | 7                             |
| slabriki                       | candle bush              | flowers, leaves                    | <i>Senna alata</i> (L.) Roxb.                     | Fabaceae         | 10        | 4                             |
| sinaas                         | orange                   | fruit, fruit shell, leaves         | <i>Citrus sinensis</i> (L.) Osbeck                | Rutaceae         | 9         | 7                             |
| anijlsblad                     | -                        | leaves                             | <i>Piper</i> spp.                                 | Piperaceae       | 9         | 6                             |
| papaya                         | pawpaw                   | fruit (green and ripe)             | <i>Carica papaya</i> L.                           | Caricaceae       | 9         | 5                             |
| bospapaya, congo pompu         | pumpwood                 | leaves                             | <i>Cecropia sciadophylla</i> Mart.                | Cecropiaceae     | 9         | 2                             |
| kumis kutching                 | cat's whiskers           | leaves                             | <i>Orthosiphon aristatus</i> (Blume) Miq.         | Lamiaceae        | 8         | 5                             |
| kasjoe                         | cashew                   | fruit, bark                        | <i>Anacardium occidentale</i> L.                  | Anacardiaceae    | 8         | 4                             |
| nootmuskaat                    | nutmeg                   | seed (imported)                    | <i>Myristica fragrans</i> Houtt.                  | Myristicaceae    | 7         | 6                             |
| bita wiri                      | bitterleaf               | leaves                             | <i>Cestrum latifolium</i> Lam.                    | Solanaceae       | 7         | 5                             |
| banaan                         | banana                   | fruit (green and ripe)             | <i>Musa</i> sp.                                   | Musaceae         | 7         | 5                             |
| loango tete                    | -                        | wood                               | <i>Aristolochia consimilis</i> Mast.              | Aristolochiaceae | 7         | 3                             |
| krappa                         | crabwood                 | bark, oil from seed                | <i>Carapa guianensis</i> Aubl.                    | Meliaceae        | 7         | 3                             |

|                            |                                |                                    |                                                          |                |   |   |
|----------------------------|--------------------------------|------------------------------------|----------------------------------------------------------|----------------|---|---|
| grapefruit                 | grapefruit                     | fruit                              | <i>Citrus paradisi</i> Macfad.                           | Rutaceae       | 6 | 5 |
| batoto bata                | wild tomato                    | entire plant                       | <i>Physalis angulata</i> L.                              | Solanaceae     | 6 | 4 |
| antroewa                   | African eggplant               | fruit                              | <i>Solanum macrocarpon</i> L.                            | Solanaceae     | 6 | 4 |
| brudu wiri                 | St. John's Bush                | leaves                             | <i>Justicia secunda</i> Vahl                             | Acanthaceae    | 6 | 3 |
| pomme cithere              | Jewish plum                    | fruit (green and ripe)             | <i>Spondias dulcis</i> Parkinson                         | Anacardiaceae  | 5 | 5 |
| parabita                   | -                              | leaves                             | <i>Solanum leucocarpon</i> Dunal                         | Solanaceae     | 5 | 4 |
| citroen                    | lemon                          | fruit                              | <i>Citrus limon</i> (L.) Burm. f.                        | Rutaceae       | 5 | 3 |
| senneblad                  | senna leaves                   | leaves (imported)                  | <i>Senna</i> cf. <i>alexandrina</i> Mill.                | Fabaceae       | 5 | 3 |
| pampoen                    | pumpkin                        | flowers, leaves                    | <i>Cucurbita moschata</i> Duchesne                       | Cucurbitaceae  | 5 | 2 |
| kruidnagel                 | cloves                         | flowers                            | <i>Syzygium aromaticum</i> (L.) Merr. & L.M.Perr         | Myrtaceae      | 5 | 2 |
| hoepelolie                 | -                              | bark, oil from bark                | <i>Copaifera guyanensis</i> Desf.                        | Fabaceae       | 4 | 4 |
| birambi, fransman / lange  | bilimbi                        | leaves, fruit                      | <i>Averrhoa bilimbi</i> L.                               | Oxalidaceae    | 4 | 3 |
| mintwater, mintolie        | mint oil                       | oil from leaves (imported)         | <i>Mentha</i> sp.                                        | Lamiaceae      | 4 | 3 |
| tulsi                      | holy tulsi                     | leaves                             | <i>Ocimum tenuiflorum</i> L.                             | Lamiaceae      | 4 | 3 |
| jamoen                     | jamoon                         | fruit, bark                        | <i>Syzygium cumini</i> (L.) Skeels                       | Myrtaceae      | 4 | 3 |
| sangrafu                   | spiral ginger                  | stem                               | <i>Costus arabicus</i> L. and <i>C. scaber</i> Ruiz & P. | Costaceae      | 4 | 2 |
| loksi                      | West Indian locust             | bark                               | <i>Hymenaea courbaril</i> L.                             | Fabaceae       | 4 | 2 |
| castorolie, wonderolie     | castor oil                     | oil from seed                      | <i>Ricinus communis</i> L.                               | Euphorbiaceae  | 4 | 2 |
| wit ede                    | American burnweed              | entire plant                       | <i>Erechtites hieracifolia</i> (L.) Raf.                 | Asteraceae     | 4 | 1 |
| eiwitblad                  | flat-on-the-ground             | entire plant                       | <i>Microtea debilis</i> Sw.                              | Phytolacaceae  | 4 | 1 |
| tamarindeblad              | tamarind                       | leaves                             | <i>Tamarindus indica</i> L.                              | Fabaceae       | 4 | 1 |
| kotomisie (witte)          | Madagascar periwinkle          | entire plant (white-flowered form) | <i>Cathartus roseus</i> (L.) G.Don                       | Apocynaceae    | 4 | 0 |
| rode croton, tufesi wiwiri | copperleaf                     | leaves                             | <i>Acalypha wilkesiana</i> Müll.Arg.                     | Euphorbiaceae  | 3 | 3 |
| goal para thee             | green tea                      | leaves (imported)                  | <i>Camellia sinensis</i> (L.) Kuntze                     | Theaceae       | 3 | 3 |
| tajerblad                  | eddoe, arrowleaf elephant ear  | leaves                             | <i>Colocasia esculenta</i> (L.) Schott and <i>Xantho</i> | Araceae        | 3 | 3 |
| steranijs                  | star anise                     | seeds (imported)                   | <i>Illicium verum</i> Hook. f.                           | Schisandraceae | 3 | 3 |
| dagublad                   | water spinach                  | entire plant                       | <i>Ipomoea aquatica</i> Forssk.                          | Convolvulaceae | 3 | 3 |
| bittere cassave            | bitter cassava                 | tuber                              | <i>Manihot esculenta</i> Crantz.                         | Euphorbiaceae  | 3 | 3 |
| sopropo, gecultiveerde     | bitter melon (cultivated form) | fruit                              | <i>Momordica charantia</i> L.                            | Cucurbitaceae  | 3 | 3 |
| uien                       | onion                          | bulb (imported)                    | <i>Allium cepa</i> L.                                    | Alliaceae      | 3 | 2 |
| sekrepatu wiwiri           | water hemp                     | entire plant                       | <i>Ayapana triplinervis</i> (Vahl) R.M.King & H.Rc       | Asteraceae     | 3 | 2 |
| wonderblad                 | leaf-of-life                   | leaves                             | <i>Bryophyllum pinnatum</i> (Lam.) Oken                  | Crassulaceae   | 3 | 2 |
| kalebas                    | calabash                       | fruit                              | <i>Crescentia cujete</i> L.                              | Bignoniaceae   | 3 | 2 |
| kwintu, sneki wiwiri       | Mexican coriander              | entire plant                       | <i>Eryngium foetidum</i> L.                              | Apiaceae       | 3 | 2 |
| sukrutante                 | -                              | leaves                             | <i>Tilesia baccata</i> (L.) Pruski                       | Asteraceae     | 3 | 2 |
| krerekrereblad, rode       | peacock flower                 | leaves (red-flowered form)         | <i>Caesalpinia pulcherrima</i> (L.) Sw.                  | Fabaceae       | 3 | 1 |
| komkommer, gecultiveerde   | cucumber                       | fruit                              | <i>Cucumis sativus</i> L.                                | Cucurbitaceae  | 3 | 1 |
| rosa wiri                  | false daisy                    | entire plant                       | <i>Eclipta prostrata</i> (L.) L.                         | Asteraceae     | 3 | 1 |

|                       |                     |                                  |                                                     |                  |   |   |
|-----------------------|---------------------|----------------------------------|-----------------------------------------------------|------------------|---|---|
| west-indische kers    | West Indian cherry  | fruit                            | <i>Malpighia glabra</i> L.                          | Malpighiaceae    | 3 | 1 |
| manja                 | mango               | leaves, bark                     | <i>Mangifera indica</i> L.                          | Anacardiaceae    | 3 | 1 |
| anijszaad             | anise seed          | seed (imported)                  | <i>Pimpinella anisum</i> L.                         | Apiaceae         | 3 | 1 |
| pedrekoe              | -                   | fruit                            | <i>Xylopia discreta</i> (L.f.) Sprague & Hutch.     | Annonaceae       | 3 | 0 |
| kattestaart           | chenille plant      | leaves                           | <i>Acalypha hispida</i> Burm. f.                    | Euphorbiaceae    | 2 | 2 |
| komijn                | cumin               | seed (imported)                  | <i>Cuminum cyminum</i> L.                           | Apiaceae         | 2 | 2 |
| Echinaforce Dr. Vogel | Echinaforce         | processed extract (imported)     | <i>Echinacea</i> spp.                               | Asteraceae       | 2 | 2 |
| asafoetida            | asafoetida          | root paste (imported from India) | <i>Ferula assa-foetida</i> L.                       | Apiaceae         | 2 | 2 |
| napi                  | sweet potato        | tuber                            | <i>Ipomoea batatas</i> (L.) Poir.                   | Convolvulaceae   | 2 | 2 |
| tomaat                | tomato              | fruit                            | <i>Lycopersicon esculentum</i> Mill.                | Solanaceae       | 2 | 2 |
| agoma wiwiri          | American nightshade | entire plant                     | <i>Solanum americanum</i> Mill.                     | Solanaceae       | 2 | 2 |
| kastanje blad         | breadnut            | leaves                           | <i>Artocarpus altilis</i> (Parkinson ex F.A.Zorn) F | Moraceae         | 2 | 1 |
| kowru ati             | -                   | entire plant                     | <i>Begonia glabra</i> Aubl.                         | Begoniaceae      | 2 | 1 |
| peper                 | red pepper          | fruit juice                      | <i>Capsicum anuum</i> L.                            | Solanaceae       | 2 | 1 |
| feyfi finga           | bread and cheese    | leaves                           | <i>Paullinia pinnata</i> L.                         | Sapindaceae      | 2 | 1 |
| avocado               | avocado pear        | leaves                           | <i>Persea americana</i> Mill.                       | Lauraceae        | 2 | 1 |
| rozebottelthee        | rose-hip            | fruit (imported)                 | <i>Rosa canina</i> L.                               | Rosaceae         | 2 | 1 |
| duruduru              | -                   | wood                             | <i>Tanaecium bilabiatum</i> (Sprague) L.G.Lohm      | Bignoniaceae     | 2 | 1 |
| merkiwiwiri           | chickenweed         | entire plant                     | <i>Euphorbia thymifolia</i> L.                      | Euphorbiaceae    | 2 | 0 |
| nengre kondre pepre   | grains of paradise  | seed                             | <i>Aframomum melegueta</i> K.Schum.                 | Zingiberaceae    | 1 | 1 |
| prei                  | leek                | leaves                           | <i>Allium ampeloprasum</i> L.                       | Amaryllidaceae   | 1 | 1 |
| spinazie              | amaranth            | leaves                           | <i>Amaranthus blitum</i> L.                         | Amaranthaceae    | 1 | 1 |
| ananas                | pineapple           | fruit                            | <i>Ananas comosus</i> (L.) Merr.                    | Bromeliaceae     | 1 | 1 |
| birambi ster          | star fruit          | fruit                            | <i>Averrhoa carambola</i> L.                        | Oxalidaceae      | 1 | 1 |
| kaneel                | cinnamon            | bark                             | <i>Cinnamomum verum</i> J. Presl.                   | Lauraceae        | 1 | 1 |
| Chinese tayer         | eddoe               | tuber                            | <i>Colocasia esculenta</i> (L.) Schott              | Araceae          | 1 | 1 |
| ingi pipa             | -                   | fruit                            | <i>Couratari</i> sp.                                | Lecythidaceae    | 1 | 1 |
| hrdi, geelwortel      | turmeric            | rhizome                          | <i>Curcuma longa</i> L.                             | Zingiberaceae    | 1 | 1 |
| laos                  | laos                | root                             | <i>Alpinia galanga</i> (L.) Willd.                  | Zingiberaceae    | 1 | 1 |
| cactus                | creeping spurge     | entire plant                     | <i>Euphorbia neriifolia</i> L.                      | Euphorbiaceae    | 1 | 1 |
| sojabonen             | soy beans           | seeds (imported)                 | <i>Glycine max</i> (L.) Merr.                       | Fabaceae         | 1 | 1 |
| kakanoto              | physic nut          | seed                             | <i>Jatropha curcas</i> L.                           | Euphorbiaceae    | 1 | 1 |
| brantimakka           | manatee bush        | leaves                           | <i>Machaerium lunatum</i> (L.f.) Ducke              | Fabaceae         | 1 | 1 |
| komkommer (wild)      | wild cucumber       | fruit                            | <i>Melothria pendula</i> L.                         | Cucurbitaceae    | 1 | 1 |
| ginseng               | ginseng root        | root (imported)                  | <i>Panax ginseng</i> C.A. Mey                       | Araliaceae       | 1 | 1 |
| foengoe               | -                   | hair from leaves                 | <i>Parinari campestris</i> Aubl.                    | Chrysobalanaceae | 1 | 1 |
| bakru wiri            | Guinea hen weed     | entire plant                     | <i>Petiveria alliacea</i> L.                        | Phytolacaceae    | 1 | 1 |
| paanblad              | betle leaf          | leaves                           | <i>Piper betle</i> L.                               | Piperaceae       | 1 | 1 |

|                      |                      |                               |                                                          |               |   |   |
|----------------------|----------------------|-------------------------------|----------------------------------------------------------|---------------|---|---|
| zwarte peper         | black pepper         | seeds (imported)              | <i>Piper nigrum</i> L.                                   | Piperaceae    | 1 | 1 |
| fukufukuminti        | Mexican mint         | leaves                        | <i>Plectranthus amboinicus</i> (Lour.) Spreng.           | Lamiaceae     | 1 | 1 |
| bakru wiri           | clammy bur           | entire plant                  | <i>Priva lappulacea</i> (L.) Pers.                       | Verbenaceae   | 1 | 1 |
| ramenas              | black radish         | tuber                         | <i>Raphanus raphanistrum</i> ssp. <i>sativus</i> (L.) DC | Brassicaceae  | 1 | 1 |
| roosolie, rozenblad  | rose oil             | flowers, in oil (imported)    | <i>Rosa</i> sp.                                          | Rosaceae      | 1 | 1 |
| vlier                | American elderberry  | leaves                        | <i>Sambucus canadensis</i> L.                            | Adoxaceae     | 1 | 1 |
| bostomaat            | -                    | fruit                         | <i>Solanum stramonifolium</i> Jacq.                      | Solanaceae    | 1 | 1 |
| drunguman            | worm bush, pink root | entire plant                  | <i>Spigelia anthelmia</i> L.                             | Loganiaceae   | 1 | 1 |
| kamferbita           | camphor bitters      | entire plant                  | <i>Unxia camphorata</i> L. f.                            | Asteraceae    | 1 | 1 |
| blakaston            | Chinese jujube       | fruit (imported)              | <i>Ziziphus jujuba</i> Mill.                             | Rhamnaceae    | 1 | 1 |
| gotu kola            | centella             | entire plant (imported)       | <i>Centella asiatica</i> (L.) Urb.                       | Apiaceae      | 1 | 1 |
| bamboe               | bamboo               | leaves                        | <i>Bambusa vulgaris</i> Schrad.                          | Poaceae       | 1 | 0 |
| kusuwe               | annatto              | leaves, fruit                 | <i>Bixa orellana</i> L.                                  | Bixaceae      | 1 | 0 |
| watermelon           | watermelon           | fruit                         | <i>Citrullus lanatus</i> (Thunb.) Matsum. & Nakai        | Cucurbitaceae | 1 | 0 |
| mauby                | mauby                | bark (imported from Trinidad) | <i>Colubrina arborescens</i> (Mill.) Sarg., C. ellipt    | Rhamnaceae    | 1 | 0 |
| tafrabon             | table tree           | leaves                        | <i>Cordia tetrandra</i> Aubl.                            | Boraginaceae  | 1 | 0 |
| podosiri             | asai fruits          | fruit juice                   | <i>Euterpe oleraceae</i> Mart.                           | Arecaceae     | 1 | 0 |
| ginkgo biloba        | ginkgo               | leaves (imported from China)  | <i>Ginkgo biloba</i> L.                                  | Ginkgoaceae   | 1 | 0 |
| balsemien            | balsamine            | entire plant                  | <i>Impatiens</i> sp.                                     | Balsaminaceae | 1 | 0 |
| faya lobi            | flame of the woods   | leaves, flowers               | <i>Ixora coccinea</i> L.                                 | Rubiaceae     | 1 | 0 |
| brandnetel           | stinging nettle      | leaves                        | <i>Laportea aestuans</i> (L.) Chew                       | Urticaceae    | 1 | 0 |
| blaka tiki menti     | bushy matgrass       | leaves                        | <i>Lippia alba</i> (Mill.) N.E. Brown                    | Verbenaceae   | 1 | 0 |
| brokobaka            | mile-a-minute        | leaves                        | <i>Mikania micrantha</i> Kunth                           | Asteraceae    | 1 | 0 |
| mokomoko             | -                    | leaves                        | <i>Montrichardia arborescens</i> (L.) Schott             | Araceae       | 1 | 0 |
| lotuszaad            | lotus                | seed                          | <i>Nelumbo nucifera</i> Gaertn.                          | Nelumbonaceae | 1 | 0 |
| tabak                | tobacco              | leaves                        | <i>Nicotiana tabacum</i> L.                              | Solanaceae    | 1 | 0 |
| smeri wiwiri         | wild sweet basil     | entire plant                  | <i>Ocimum campechianum</i> Mill.                         | Lamiaceae     | 1 | 0 |
| tiensensi wiri       | creeping peperomia   | entire plant                  | <i>Peperomia rotundifolia</i> (L.) Kunth                 | Piperaceae    | 1 | 0 |
| fowru doti           | bird vine            | entire plant                  | <i>Phthirusa stelis</i> (L.) Kuijt                       | Loranthaceae  | 1 | 0 |
| granaatappelschil    | pomegranata          | fruit shell                   | <i>Punica granatum</i> L.                                | Lythraceae    | 1 | 0 |
| boulanger, aubergine | eggplant             | fruit                         | <i>Solanum melongena</i> L.                              | Solanaceae    | 1 | 0 |
| aardappel            | potato               | tuber (imported)              | <i>Solanum tuberosum</i> L.                              | Solanaceae    | 1 | 0 |
| amandel              | almond               | leaves                        | <i>Terminalia catappa</i> L.                             | Combretaceae  | 1 | 0 |
| malva                | sleepy morning       | entire plant                  | <i>Waltheria indica</i> L.                               | Malvaceae     | 1 | 0 |
| mais                 | maize                | seed, leaves, flower          | <i>Zea mays</i> L. subsp. <i>mays</i>                    | Poaceae       | 1 | 0 |

## UNKNOWN PLANT SPECIES AND MIXTURES

|                        |                          |                                    |                                                                   |    |    |
|------------------------|--------------------------|------------------------------------|-------------------------------------------------------------------|----|----|
| bita                   | bitters                  | various species                    | mixture for health promotion, uterus cleansing and aphrodisiac    | 29 | 17 |
| unknown                | -                        | unknown plant species              |                                                                   | 18 | 10 |
| bittere groenten       | bitter vegetables        | various species of leaves          | single species, boiled as vegetable                               | 12 | 7  |
| kruidenbad             | herbal bath              | various leaves                     | mixture                                                           | 12 | 7  |
| kowru dresie           | laxative                 | plants and (imported) chemicals    | mixture (strong laxative)                                         | 6  | 4  |
| uma wasi               | genital steam bath       | various species of leaves and/or b | mixture (genital steam bath)                                      | 6  | 4  |
| Chinese kruiden        | Chinese herbs            | various Chinese species            | imported by Chinese shops                                         | 4  | 3  |
| djumu, djamu           | jamu                     | various Javanese rhizomes          | imported by Javanese and home-made                                | 4  | 2  |
| fruit                  | fruits (general)         | various fruit species              |                                                                   | 3  | 2  |
| chinees poeder kruiden | Chinese 5-spice powder   | spice mixture                      | mixture of black pepper, cloves, star anise, cinnamon and fennel. | 2  | 2  |
| massala                | massala                  | various Asian spices               | spice mixture, imported from India or home-made                   | 2  | 1  |
| kwakoe kiri alende     | -                        | unknown plant species              | bark against hepatitis                                            | 2  | 0  |
| odany jewa             | -                        | several plant species              | commercially processed herbal medicine                            | 1  | 1  |
| kerrie                 | curry powder             | various Asian rhizomes             | spice powder (curry), imported from India or home-made            | 1  | 1  |
| man batra              | aphrodisiac mixture      | various wood, barks, roots         | aphrodisiac mixture soaked in alcohol                             | 1  | 1  |
| murudresie             | uterus cleansing mixture | various species                    | mixture of native species for womb cleansing                      | 1  | 0  |
| kargasok               | kargasok                 | yeast product                      | imported homeopathic product                                      | 1  | 0  |

## ANIMAL PRODUCTS

|           |   |                         |                                                        |    |    |
|-----------|---|-------------------------|--------------------------------------------------------|----|----|
| honing    | - | honey                   | imported or wild-collected                             | 10 | 10 |
| diatoe    | - | deer horn               | probably <i>Odocoileus virginianus</i> Zimmermann 1780 | 3  | 3  |
| aboma vet | - | fat from anaconda snake | <i>Eunectes murinus</i> L. (1758)                      | 1  | 0  |

## CHEMICAL OR OTHER PRODUCTS

|             |   |                            |                                                      |   |   |
|-------------|---|----------------------------|------------------------------------------------------|---|---|
| kamfer      | - | synthetic camphor          | imported                                             | 2 | 2 |
| blauwsel    | - | Reckitt blue synthetic dye | imported                                             | 1 | 1 |
| dondersteen | - | stone axe                  | found in prehistoric Amerindian sites                | 1 | 1 |
| bere te     | - | unknown substance          | umbilical cord? (literal translation of Sranantongo) | 1 | 1 |
| epsomzout   | - | magnesium sulfate          | imported                                             | 1 | 1 |
| pemba       | - | white clay (kaolin)        | harvested in savanna belt                            | 1 | 1 |
| petroleum   | - | kerosine                   | imported                                             | 1 | 0 |
